# Supplementary material for: Relations Between Subclinical Disease Markers and Type 2 Diabetes, Metabolic Syndrome, and Incident Cardiovascular Disease: The Jackson Heart Study
Source: Oxford University Press journal article supplement (doi:10.2337/dc14-2460), 2015-03-12
Supplement: dc142460supplementarydata.pdf [file dc142460supplementarydata.pdf]

SUPPLEMENTARY DATA

**Supplementary Table 1.** Definitions of Subclinical Vascular Disease

| Characteristic                                        | Definition of subclinical disease component                                                                                                                                     | Cut-points for subclinical disease presence used in the present study                                                                                                                          |
|-------------------------------------------------------|---------------------------------------------------------------------------------------------------------------------------------------------------------------------------------|------------------------------------------------------------------------------------------------------------------------------------------------------------------------------------------------|
| <b>1 Coronary artery calcification (CAC)</b>          |                                                                                                                                                                                 |                                                                                                                                                                                                |
| Increased CAC                                         | CAC was defined as an Agatston score > 10 on CT angiography <sup>4 5</sup>                                                                                                      | CAC > 100 <sup>10</sup>                                                                                                                                                                        |
| <b>2. LV hypertrophy by echocardiography</b>          |                                                                                                                                                                                 |                                                                                                                                                                                                |
| LV hypertrophy by echocardiography                    | LV mass was calculated as $0.8 \{1.04 [(IVS+LVEDD+PW)^3 - (LVEDD)^3] \} + 0.6$ g. LV mass values were then adjusted for height <sup>2,7</sup>                                   | $\geq 51 \text{ g/m}^{2.7}$ for both men and women <sup>9</sup>                                                                                                                                |
| <b>3. LV systolic dysfunction by echocardiography</b> |                                                                                                                                                                                 |                                                                                                                                                                                                |
| LV systolic dysfunction                               | Visual assessment on echocardiography                                                                                                                                           | By evidence on two-dimensional echocardiography of mild or greater systolic dysfunction on visual assessment in multiple views (corresponding to ejection fraction less than 50%) <sup>6</sup> |
| <b>4. Peripheral arterial disease</b>                 |                                                                                                                                                                                 |                                                                                                                                                                                                |
| Ankle-brachial index $\leq 0.9$                       | Defined as the ratio of the average systolic blood pressure at the ankle of each leg divided by the average systolic blood pressure in the arm with the highest blood pressure. | An ankle-brachial index at or below 0.9 on either leg <sup>6</sup>                                                                                                                             |

## SUPPLEMENTARY DATA

| <b>5. <i>Microalbuminuria</i></b> |                                                                                                                                                  |                                                           |
|-----------------------------------|--------------------------------------------------------------------------------------------------------------------------------------------------|-----------------------------------------------------------|
| Microalbuminuria                  | An urine albumin to urine creatinine ratio $\geq 25$ $\mu\text{g}/\text{mg}$ in men, and $\geq 35$ $\mu\text{g}/\text{mg}$ in women <sup>6</sup> | Presence of microalbuminuria according to the definition. |

Abbreviations: IVS = Intact Ventricular Septum, LVEDD = Left Ventricle End Diastolic Dimension, PW = Posterior Wall

SUPPLEMENTARY DATA

**Supplementary Table 2.** Incidence of cardiovascular disease, with Exam 2 serving as baseline

| Characteristic                        | No. of Events<br>/ No. at Risk | Person-<br>Years At<br>Risk | Incidence<br>Rate,<br>per 1000<br>p-years | Age- and Sex-Adjusted<br>Rate % (95% CI) |
|---------------------------------------|--------------------------------|-----------------------------|-------------------------------------------|------------------------------------------|
| <b>Referent<sup>*</sup></b>           |                                |                             |                                           |                                          |
| All                                   | 63/2533                        | 9992                        | 6.30                                      | 1.81(1.32-2.49)                          |
| No subclinical disease                | 25/2010                        | 7995                        | 3.13                                      | 0.65(0.36-1.18)                          |
| Any subclinical disease present       | 34/462                         | 1763                        | 19.3                                      | 2.51(1.37-4.55)                          |
| <b>Metabolic syndrome<sup>†</sup></b> |                                |                             |                                           |                                          |
| All                                   | 56/1074                        | 4171                        | 13.4                                      | 4.03(2.92-5.53)                          |
| No subclinical disease                | 26/736                         | 2883                        | 9.02                                      | 3.83(2.48-5.86)                          |
| Any subclinical disease present       | 27/310                         | 1184                        | 22.8                                      | 5.82(3.53-9.46)                          |
| <b>Diabetes</b>                       |                                |                             |                                           |                                          |
| All                                   | 73/722                         | 2714                        | 26.9                                      | 6.34(4.62-8.63)                          |
| No subclinical disease                | 27/392                         | 1507                        | 17.9                                      | 6.97(4.42-10.83)                         |
| Any subclinical disease present       | 42/310                         | 1134                        | 37.0                                      | 11.42(7.88-16.26)                        |
